# Supplementary material
Source: Springer Nature journal article supplement (https://www.springermedizin.de/resource/supplementary/12879_2010_1377_MOESM1_ESM.pdf/9443126)

A- CD45/CD34/CD19/CD22

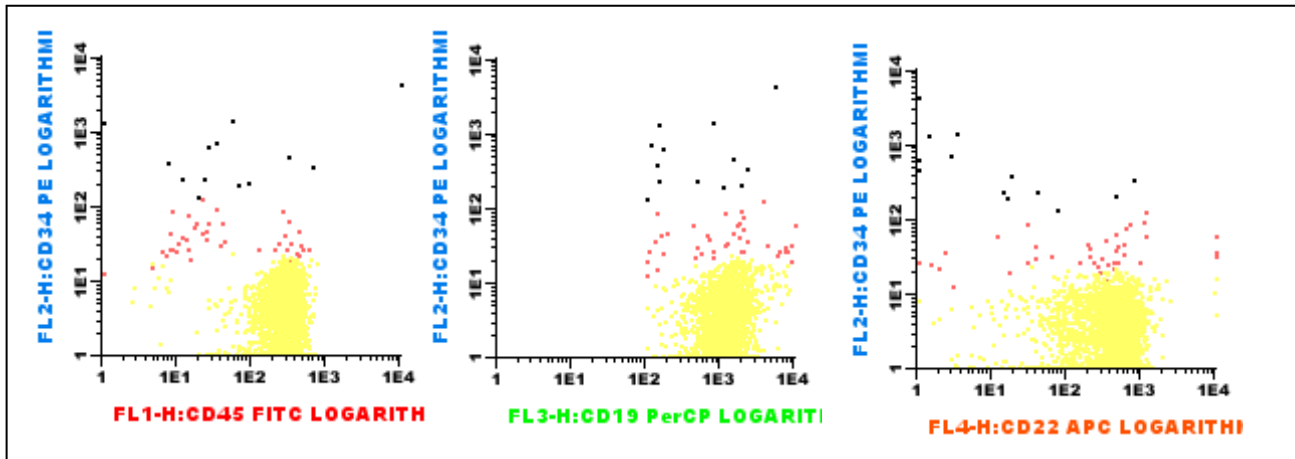

B- sIgM/CD34/CD19/CD10

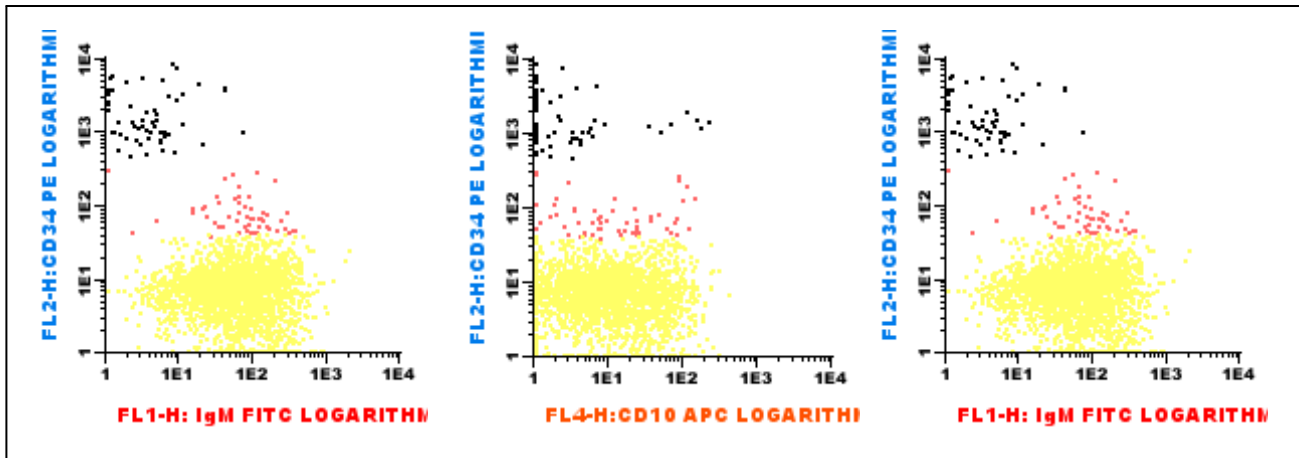

Supplement: MOESM1 [file 9443126]
